# Supplementary material for: 5 kyr of ﬁre history in the High North Atlantic Region: naturalvariability and ancient human forcing
Source: Copernicus journal article supplement (doi:10.5194/cp-2021-26), 2021-03-22
Supplement: Supplementary file [file cp-2021-26-RC1-supplement.pdf]

# 5 kyr of fire history in the High North Atlantic Region: natural variability and ancient human forcing

Delia Segato<sup>1,2</sup>, Maria Del Carmen Villoslada Hidalgo<sup>1,2,3</sup>, Ross Edwards<sup>4</sup>, Elena Barbaro<sup>1,2</sup>, Paul Vallelonga<sup>5,6</sup>, Helle Astrid Kjær<sup>5</sup>, Marius Simonsen<sup>5</sup>, Bo Vinther<sup>5</sup>, Niccolò Maffezzoli<sup>1,2</sup>, Roberta Zangrando<sup>1,2</sup>, Clara Turetta<sup>1,2</sup>, Dario Battistel<sup>1,2</sup>, Orri Vésteinsson<sup>7</sup>, Carlo Barbante<sup>1,2</sup>, and Andrea Spolaor<sup>1,2</sup>

<sup>1</sup>Department of Environmental Sciences, Informatics and Statistics, Ca' Foscari University of Venice, Via Torino 155, 30170 Mestre, Italy

<sup>2</sup>CNR-Institute of Polar Sciences (ISP-CNR), Via Torino 155, 30170 Mestre, Italy

<sup>3</sup>CIC nanoGUNE BRTA, Tolosa Hiribidea 76, 20018 San Sebastian, Spain

<sup>4</sup>Curtin University, Kent St, Bentley WA 6102, Australia

<sup>5</sup>Centre for Ice and Climate, Physics of Ice, Climate and Earth, Niels Bohr Institute, University of Copenhagen, Copenhagen, Denmark

<sup>6</sup>UWA Oceans Institute, University of Western Australia, Crawley WA 6009, Australia

<sup>7</sup>University of Iceland, Archaeology Department, University of Iceland, Archaeology Department, Sæmundargata 2, 101 Reykjavík, Iceland

**Correspondence:** Andrea Spolaor (andrea.spolaor@cnr.it)

**Abstract.** Biomass burning influences global atmospheric chemistry by releasing greenhouse gases and climate-forcing aerosols. There is controversy about the magnitude and timing of Holocene changes in biomass burning emissions from millennial to centennial time scales and, in particular, on the possible impact of ancient civilizations. Here we present a 5 kyr record of fire activity proxies levoglucosan, black carbon and ammonium measured in the RECAP ice core, drilled in the coastal East Greenland and therefore affected by processes occurring in the High North Atlantic Region. Levoglucosan and ammonium fluxes show high levels from 5 to 4.5 kyr followed by an abrupt decline, possibly due to monotonic decline in Northern Hemisphere summer insolation. Levoglucosan and black carbon show an abrupt decline at 1.1 kyr BP (before 2000 AD), suggesting a decline in wildfire regime in the Icelandic territory due to the extensive land clearing caused by Viking colonizers. A minimum is reached at 0.5 kyr BP for all fire proxies, after which levoglucosan and ammonium fluxes increase again, in particular over the last 200 years. We find that the fire regime reconstructed from RECAP fluxes seems mainly related to climatic changes, however over the last millennium human activities might have had a substantial influence controlling the occurrence of fire.

## 1 Introduction

Extensive forest fires, also at high latitudes, have recently generated worldwide attention and raised concerns about the impacts of humans and climate change on wildfire regimes. During summer 2020 wildfires over the Arctic Circle emitted 35% more CO<sub>2</sub> than the previous year, with a significant contributor being peatland fires (Witze, 2020). However, little is known about the patterns and driving forces of fire activity in the past. Quantitative observations of wildfires are severely limited both in time

and space and coverage in global datasets based on satellite observations began only in the last decades (Xiao-rui et al., 2005; van der Werf et al., 2006). In order to understand the climate – human – fire relationship over long timescales, proxy records of biomass burning are invaluable.

20 Fire is influenced by both human activities and climate and is a key Earth system process (Bowman et al., 2009; Keywood et al., 2013). As a major component of the carbon cycle, fire interacts with the climate system by releasing particulates, greenhouse gases, including CO<sub>2</sub>, CO, CH<sub>4</sub>, NO<sub>x</sub>, and black carbon (Bowman et al., 2009). Climatic conditions (temperature, insolation changes, atmospheric CO<sub>2</sub>, precipitation) are the fundamental drivers for the ignition and spread of fire (Andela et al., 2017; Marlon et al., 2008, 2013; Power et al., 2008; Molinari et al., 2018) and understanding the causes and consequences of  
25 fires is critical for assessing the state of the Earth system, because of the close relationship between fire, vegetation, and climate.

Anthropogenic activities have influenced the environment well before the Industrial revolution, as several studies suggest (Ruddiman, 2003; Doughty, 2013). All the continents (except Antarctica) were settled by the beginning of the Holocene, thus this period provides crucial context for fire-human-climate interactions and an opportunity to disentangle climate and human contributions in changing fire regimes (Marlon et al., 2013). It has been argued that human activities have influenced fire activity  
30 for millennia (Marlon et al., 2008; Power et al., 2008). In the earliest phase of agricultural development, farmers used fire to clear land through the slash and burn technique (Ruddiman and Ellis, 2009). With the establishment of the first agricultural societies in Europe in the mid-Holocene, humans substantially altered the European landscape (Price, 2000). The attribution of changes in fire regime to human impact is largely based on the synchronicity of these changes and indicators of human activity, such as changes in erosion rates, vegetation and land use (Marlon et al., 2013). Ruddiman (2003) explicitly argued that land  
35 use changes in Eurasia during the early to mid-Holocene could explain increases in CH<sub>4</sub> and CO<sub>2</sub> atmospheric concentrations and that these changes had a significant impact on climate. Fire variability inferred from NEEM ice core (Greenland) was associated with droughts as well as temperature and summer insolation variability, however from 4 kyr BP fire trends could not be explained without considering human influence in altering vegetation distribution especially in Europe (Zennaro et al., 2015). Sapart et al. (2012) found an increase in pyrogenic CH<sub>4</sub> emissions at the times of the Roman Empire (100 BC – 300  
40 AD), the Medieval Climate anomaly (800 – 1200 AD) and the Little Ice Age (1300 – 1600 AD) from the analysis of CH<sub>4</sub> isotopic composition of the air trapped in the Greenlandic EUROCORE and NEEM ice cores. The increase associated with the Roman Empire was attributed to an increase of charcoal use from metal production and to the contemporary civilizations in China and India. On the other hand, the increase during Medieval time has been associated with both extended droughts in Northern Europe and accelerating deforestation in both Europe and Asia, while the increase detected during the Little Ice Age  
45 has been explained by natural wildfires and by rapid land clearance in the Northern Hemisphere (Sapart et al., 2012).

A diverse range of paleo-tracers has been used to reconstruct biomass burning from different climate archives such as fire scars on tree rings, ice core records of gases and aerosol-borne chemicals (Legrand et al., 2016; Rubino et al., 2015) and sedimentary charcoal records (Marlon et al., 2008, 2016; Power et al., 2008). These records reflect a wide range of different regions of fire locations, frequency, distribution and intensity integrated over a wide span of temporal scales (Grieman et al.,  
50 2018; Battistel et al., 2018; Lim et al., 2016). Since charcoal particles settle rapidly, one record is only locally representative (in the order of tens of kilometers) and several charcoal records need to be assembled in order to obtain a regional reconstruction

of fire activity (Marlon et al., 2008; Blarquez et al., 2014). Furthermore, several regions, like Siberia, are under-represented in the available charcoal reconstructions, reducing their potential on the reconstruction of fire history on wide spatial areas.

Ice cores from polar regions, on the other hand, are extensively used to reconstruct past climate conditions and can provide forest fire records (Legrand et al., 2016). Although being geographical point measurements, ice cores represent a record of air, moisture and aerosols sourced from regional or even hemispheric scales with up to annual and sub-annual temporal resolution (Zennaro et al., 2015; Legrand et al., 2016; Simonsen et al., 2019). They also have the great advantage to catch rapid events such as volcanoes eruptions and wildfires.

Historically, the ice concentrations of some impurities like ammonium ( $\text{NH}_4^+$ ) and  $\text{K}^+$  were suggested to be partially influenced by forest fire emissions. However, these compounds are not specific proxies as their background variations also reflect continuous biogenic emissions from vegetation and soils, while only peak values can be associated with biomass burning events (Fischer et al., 2015).  $\text{K}^+$ , additionally, has been found to be highly sensitive to contamination, making it difficult to measure its species in ice (Legrand et al., 2016). Recently, however, most of the attention has been given to two specific fire proxies levoglucosan and black carbon (BC), the latter being a specific tracer of biomass burning in the pre-industrial times (Osmont et al., 2019). Despite that  $\text{NH}_4^+$  is influenced by biogenic emissions from Greenland ice-free areas, it has been included in this study as further comparison.

Levoglucosan (1,6-anhydro- $\beta$ -D-glucopyranose) is the most abundant monosaccharide anhydride released when cellulose combustion occurs at temperatures  $> 300^\circ\text{C}$  (Simoneit, 1999). It is injected in the atmosphere in convective smoke plumes and deposited on glacier surfaces through wet and dry deposition (Gambaro et al., 2008) with a residence time up to 2 weeks (Bhattarai et al., 2019). Since levoglucosan is strongly water-soluble, it may be leached during the melt-refreeze process, reshaping the post-depositional distribution/signal (You et al., 2016). Due to its high emission factors and relatively high concentrations in the ambient aerosols it is an ideal marker compound for biomass burning (Hoffmann et al., 2010).

BC is the light-absorbing refractory carbonaceous matter emitted during incomplete combustion of fossil and biofuels in fires ignited by both natural and human sources (McConnell et al., 2007). BC is an important indicator of biomass burning for paleoclimate reconstructions, as it is a specific fire proxy for pre-Industrial times and can be measured in high resolution with Continuous Flow Analysis (McConnell et al., 2007). BC does not refer to a single well-defined compound because carbonaceous aerosols are emitted in the form of a continuum of compounds with different physical and chemical properties. BC has very low chemical reactivity in the atmosphere and its residence time is about one week; its primary removal process is wet deposition, with dry deposition contributing to 15%-40% of the total removal (Bond et al., 2013; Cape et al., 2012; Barrett et al., 2019).

Previous studies found levoglucosan and BC to have similar trends in Greenland ice cores (Legrand et al., 2016), giving further hint that ice core archives provide a complementary tool to charcoal records in examining the link between climate, human influence and fire activity. By now, several records of fire proxies from Greenland ice cores reconstruct fire history for the last few centuries, however very few extend over the past millennia. In this work we present 5 kyr long records of levoglucosan, BC and  $\text{NH}_4^+$  from the Renland ice core ( $71^\circ 18' 18'' \text{N}$ ,  $26^\circ 43' 24'' \text{W}$ ). The main objective of this paper is to

elucidate the role of climate and human activities on fire activity in the almost unstudied area of the High North Atlantic before the Industrial era.

## 2 Materials and methods

The RECAP (The REnland ice CAP) project retrieved in 2015 a 584-meter ice core drilled to the bedrock on the Renland ice cap. The Renland ice cap is situated in Eastern Greenland on a high elevation plateau on the Renland peninsula in the Scoresbysund fjord (71° 18' 18" N, 26° 43' 24" W). The ice cap is constrained by surrounding topography and its eastern plateau reaches an elevation of 2340 m at its summit. Its coastal location provides important geographic climate information that can be compared with central Greenland ice cores as well as providing a sensitive indicator of changes at the margins of the Greenland ice sheet.

The core was stored frozen and shipped to Europe, where it was cut at AWI (Alfred-Wegener Institute, Bremerhaven, Germany) and processed at the Centre for Ice and Climate (Niels Bohr Institute, University of Copenhagen, Denmark). The samples analyzed for levoglucosan were collected discretely every 55 cm from a continuous ice core melting system (Bigler et al., 2011) as part of the Continuous Flow Analysis (CFA) campaign conducted at the University of Copenhagen in autumn 2015 (Maffezzoli et al., 2019; Simonsen et al., 2019), while BC and  $\text{NH}_4^+$  were measured continuously. After collection, the discrete samples were immediately frozen at  $-20^\circ\text{C}$  and kept in the dark until analysis. In this work we consider the top 482 m of the core, corresponding to the last 5 kyr BP. The chronology is achieved by annual layer counting down to 458.3 m and below this point by volcanic matching to the GICC05 timescale (Simonsen et al., 2019).

### 2.1 Levoglucosan, BC and $\text{NH}_4^+$ analysis

Levoglucosan was determined using liquid chromatography/negative ion electrospray ionization – tandem mass spectrometry (HPLC/(-)ESI-MS/MS). This analytical method allows the direct injection of melted samples spiked with  $^{13}\text{C}_6$ -labelled internal standard into the HPLC instrument, avoiding contamination during pre-analytical steps (Gambaro et al., 2008; Zennaro et al., 2014; Battistel et al., 2018). All pre-analytical steps were performed under a Class-100 clean bench located in a Class-100 clean room at Ca' Foscari University of Venice. Purelab Ultra system (Elga, High Wycombe, U.K.) was used to produce the ultrapure water (18.2  $\text{M}\Omega$  cm, 0.01 TOC) utilized in all analytical and pre-analytical procedures (i.e. cleaning and decontamination procedures, standard solutions preparation and chromatographic analysis) (Gambaro et al., 2008).

BC analysis was conducted using a BC analyzer (SP2, Droplet Measurement Technologies, Boulder, Colorado) connected to the CFA system, following the method of McConnell et al. (2007). The SP2 measures mass of individual BC particles using laser-induced incandescence. BC particles absorb sufficient energy as they pass through the laser beam and reach a temperature at which they incandesce. Intensity of the incandescence is measured with a photomultiplier tube and recorded. The mass of an individual BC particle is proportional to the area of the incandescence signal (McConnell et al., 2007).

The analysis of  $\text{NH}_4^+$  was performed by fluorescence within the CFA setup (Bigler et al., 2011). The melt water stream flowing at 1  $\text{mL min}^{-1}$  was added a reagent made from 1.29 g O-phthaldehyde ( $\text{C}_8\text{H}_6\text{O}_2$ ), 60 mL Ethanol, 900 mL purified water

(MilliQ) and a buffer made from 35.8 g  $\text{Na}_2\text{HPO}_4 \cdot 12\text{H}_2\text{O}$ , 1000 mL MilliQ, 600  $\mu\text{L}$  NaOH (>32%), 100  $\mu\text{L}$  HCHO (>37%) and 0.8 g  $\text{Na}_2\text{SO}_3$ , following 1 m of mixing coil at 80°C and 0.2 m mixing coil at room temperature the mixture was excited at 365 nm and detected at 400 nm by means of a photomultiplier based detector (PMT-FL, FIALab instruments). Three standards were used for calibration based on an 100  $\text{mg L}^{-1}$  IC multielement standard (VII, Certipur, Merck) and diluted to 24, 50 and 200 ppb  $\text{NH}_4^+$ . The melt rate of the CFA was kept between 4 and 5  $\text{cm min}^{-1}$  and with a response time of 12 seconds; the equivalent depth resolution of the  $\text{NH}_4^+$  dataset is less than 1 cm.

Based on the age scale released in Simonsen et al. (2019), the levoglucosan record covers the period from 0.089 to 5 kyr BP and a depth of 482 m, the BC record covers the period from 0.4 to 5 kyr BP and a depth of 482 m and the  $\text{NH}_4^+$  covers the entire period back to 5 kyr.

## 2.2 Potential source regions of RECAP fluxes

To identify the potential forest fires regions able to influence the RECAP site, backward trajectories have been computed using the Hybrid Single-Particle Lagrangian Integrated Trajectory (HYSPLIT) model (Stein et al., 2015) with GDAS1 meteorological data. GDAS1 dataset is available at  $1 \times 1^\circ$  resolution. The HYSPLIT model was run using the PySPLIT Python package (Warner, 2018). Trajectories were calculated every 6 h in backward mode at 3 different altitudes (500, 1000 and 2000 m above Renland elevation, 2315 m a.s.l.) for the entire dataset available, that is the period 2006-2019. A 7-days run time was chosen based on estimations of BC maximum residence time (Ramanathan and Carmichael, 2008; Cape et al., 2012).

HYSPLIT modeling tool is useful to reconstruct the most likely transport areas over recent period and the information derived can be extended, over a longer timescales (Pre-industrial or Holocene), assuming that the main atmospheric circulation mode has not changed significantly during those periods (Rubino et al., 2015). Stable isotope data ( $\delta^{18}\text{O}$ ) suggest that the circulation pattern of air masses reaching the Greenland Ice Sheet did not significantly change over the last 10 000 years (Vinther et al., 2006) which supports extending to the past back trajectory analysis based on modern conditions.

## 3 Results

### 3.1 Results from back-trajectory analysis

Seven day long back trajectories calculated with HYSPLIT model over the period 2006-2019 suggest that the higher frequency of trajectories come from the nearby areas with respect to the Renland site (Figure 1), as also evidenced by Simonsen et al. (2019) and Maffezzoli et al. (2019) studying insoluble dust and sea ice respectively. In addition to the Renland ice cap surrounding area, the coastal area immediately on the North of the Renland site appears to be the most probable source region. The South-East and South-West coastal areas of Greenland and Iceland are also ice-free source areas which provide the densest and shortest trajectories considering the density of gridded points and travelling time. We define the region ranging from the longitudes  $60^\circ\text{W} - 0^\circ$  and the latitudes  $90^\circ\text{N} - 55^\circ\text{N}$  as the region with the most likely source areas of materials arriving at Renland (red box in Figure 1) and we hereafter call it High North Atlantic Region (HNAR).

Other contributors of air masses are North America, Northern Europe and Siberia. Boreal forests of North America and  
150 Siberia are also a possible source of impurities, as well as Northern Europe (Schüpbach et al., 2018), however they require a  
longer travel path for fire emissions to reach the Renland site compared to coastal Greenland and Iceland and thus are expected  
to carry only a minor contribution.

### 3.2 Levoglucosan, BC and $\text{NH}_4^+$ results

RECAP levoglucosan, BC and  $\text{NH}_4^+$  profiles display distinct variability on centennial timescales and do not exhibit a clear  
155 trend over the past 5 kyr (Figure S1). The levoglucosan concentrations vary from 0.006 to 0.1  $\text{ng g}^{-1}$  with a mean (considering  
the whole 5 kyr record) of  $0.033 \pm 0.002 \text{ ng g}^{-1}$ , BC concentration profile varies from 0.4 to 1.7  $\text{ng g}^{-1}$  with a mean of  $0.942 \pm$   
 $0.006 \text{ ng g}^{-1}$  and  $\text{NH}_4^+$  varies from 0.09 to 17  $\text{ng g}^{-1}$  with a mean of  $5.0 \pm 0.2 \text{ ng g}^{-1}$ .

Since Levoglucosan, BC and  $\text{NH}_4^+$  can be deposited in snow and glaciers by both wet and dry deposition (Stohl et al.,  
2007), fluxes were calculated as the product of concentration with annual accumulation and expressed in  $\mu\text{g m}^{-2} \text{ y}^{-1}$ . Renland  
160 accumulation (Hughes et al., 2020; Corella et al., 2019; Simonsen et al., 2019) shows a stable profile, indicating that wet  
deposition didn't undergo drastic changes over the period covered by our record (Vinther et al., 2009). Levoglucosan flux  
(Figure 2a) exhibits the same major features observed in the concentration record, indicating that variations in the levoglucosan  
series reflect changes in the atmospheric concentration, rather than a change in snow accumulation (Grieman et al., 2018).  
Levoglucosan flux shows high levels from 5 to 4.5 kyr BP with  $31.5 \mu\text{g m}^{-2} \text{ y}^{-1}$  on average. A rather stable deposition flux is  
165 determined between 4 to 2 kyr BP while higher variability is determined during the period 2 to 1 kyr BP, with an average of  
 $17 \mu\text{g m}^{-2} \text{ y}^{-1}$ . Lower fluxes are found in the period 1 to 0.5 kyr BP with an average of  $10 \mu\text{g m}^{-2} \text{ y}^{-1}$ . BC flux is stable with an  
average of  $464 \mu\text{g m}^{-2} \text{ y}^{-1}$  over the period 5 to 1 kyr BP (Figure 2b). During this period some oscillations are detected with a  
higher depositional flux determined at ca. 3.6, 3, 2.5, 2 kyr BP. A decrease in BC flux is determined, similarly to levoglucosan,  
after 1.1 kyr BP with a value of  $372 \mu\text{g m}^{-2} \text{ y}^{-1}$ .  $\text{NH}_4^+$  flux shows higher values from 5 to 4.6 kyr BP with an average of 2889  
170  $\mu\text{g m}^{-2} \text{ y}^{-1}$  and a rather stable profile from 4 to 1.25 kyr BP ( $2387 \mu\text{g m}^{-2} \text{ y}^{-1}$  on average) and an abrupt decline at 2.7 kyr BP  
(Figure 2c). Low values ( $2037 \mu\text{g m}^{-2} \text{ y}^{-1}$ ) are detected over the period 0.99 – 0.42 kyr BP with an abrupt increase during the  
last 200 years, with a maximum flux of  $7915 \mu\text{g m}^{-2} \text{ y}^{-1}$ .

### 3.3 Statistical analysis

To investigate possible similarities with available time series, we estimated pairwise Pearson correlations among available  
175 records (Table 1). Correlation coefficients were computed after interpolating all series to obtain a 20-years time resolution.  
20-year bins have been chosen in order to maximize time resolution among all time series, limited by Northern Hemisphere  
temperature (Marcott et al., 2013). We investigated the correlation between our series with NEEM levoglucosan flux (Zennaro  
et al., 2014), Northern Hemisphere temperatures as tracer of main climate variability (Marcott et al., 2013), RECAP  $\delta^{18}\text{O}$   
(Hughes et al., 2020) and sedimentary charcoal influx composites as regional fire reconstruction calculated over North Europe,  
180 North America, Siberia and more generally for the entire HLNH (High Latitude Northern Hemisphere, lat > 55°), available  
in the Global Charcoal Database (Blarquez et al., 2014). For the RECAP core, the correlation between levoglucosan and BC

fluxes is low but significant ( $r = 0.21$ ,  $p < 0.01$ ), as well as between BC and  $\text{NH}_4^+$  ( $r = 0.27$ ,  $p < 0.01$ ). RECAP levoglucosan flux is significantly correlated with Northern Hemisphere reconstructed temperature ( $r = 0.46$ ,  $p < 0.001$ ) as well as with RECAP  $\delta^{18}\text{O}$  ( $r = 0.33$ ,  $p < 0.01$ ); RECAP BC flux is also significantly correlated with NH temperature ( $r = 0.32$ ,  $p < 0.001$ ) and with RECAP  $\delta^{18}\text{O}$  ( $r = 0.29$ ,  $p < 0.01$ ). No statistically significant correlation has been determined between RECAP biomass burning fluxes and the regional sedimentary charcoal influx composites (Table 1).

To understand the mechanisms behind fire regime changes, we examine fire flux step changes and link them with climate and human history. To determine mean changes in time series we conduct the off-line change point analysis using the ruptures Python package (Truong et al., 2019). Three optimal breakpoints were found for levoglucosan flux using the Pelt method; Dynamic programming was then applied setting three breakpoints. The breakpoints of each time series are showed in Figure 3 by a change of color. As for levoglucosan flux, two main step changes are found at 4.45 and 1.15 kyr, where the profile significantly decreases, while at 0.2 kyr BP it increases; regarding the BC flux, one strong step decline is found at 1.03 kyr BP, while for the  $\text{NH}_4^+$  flux the main step changes are found at 4.57, 4.37 and 0.12 kyr BP (Figure 3a,c,e). It was not possible to detect the concomitant shift at 1.15 kyr BP on  $\text{NH}_4^+$  flux due to absence of data.

As previously discussed, climate and especially summer temperatures have a central role in explaining the trends observed in RECAP fire reconstruction. However, other processes might be of relevance and in order to disentangle the contribution of climate in changing the fire regime, we calculate ratios between levoglucosan and BC fluxes with Northern Hemisphere reconstructed temperature from Marcott et al. (2013): a stable ratio suggests that climate is the main driver, significant variations in the ratio suggest additional processes to be in place. We perform change point analysis also on ratios between normalized levoglucosan and BC fluxes and Northern Hemisphere temperature (Levo/T and BC/T in Figure 3). The RECAP Levo/T ratio presents step changes at 4.49, 1.19 and 0.37 kyr BP, while the ratio BC/T at 4.41, 1.11 and 0.71 kyr BP (Figure 3b,d). The mean shifts at around 1.1 kyr BP of the Levo/T and BC/T differ by 100 years, however while the Levo/T ratio strongly decreases at 4.5 kyr BP, the BC/T flux increases.

## 4 Discussion

### 4.1 Climate influence on the fire regime in High North Atlantic Region

Compared to other Greenlandic ice cores such as NEEM, RECAP core is retrieved in a coastal site, thus it is speculated to be more influenced by local sources in the Holocene (Simonsen et al., 2019). From back trajectory analysis (Figure 1) and available literature (Corella et al., 2019; Simonsen et al., 2019) we infer that impurities arriving at the Renland site mostly originate in the HNAR, as defined in Section 2.2. Our record is therefore a useful archive to evaluate the fire history at the high latitudes of the North Atlantic.

Several studies suggest that climate is the main driver of global biomass burning (Marlon et al., 2008). Elevated summer temperatures and sustained droughts can affect fuel flammability and lead to increased global fire activity over seasonal to centennial timescales (Daniau et al., 2012). Climate conditions also determined forest expansion (and glacier retreat), with positive effects on fuel moisture and a dampening effect on biomass burning (Feurdean et al., 2020). Significant correlations of RECAP

215 fire proxies with NH temperature during the past 5 kyr period (Table 1) suggest that climatic conditions play an important  
role in controlling forest fire activity in the HNAR. Fire reduced throughout the late Holocene in parallel with progressively  
decreasing summer insolation in the Northern Hemisphere through the late Holocene (Power et al., 2008). Greater-than-present  
summer insolation resulted in warmer and drier summers in the Northern Hemisphere with a consequent increasing of fire as  
220 tion throughout the winter, meaning that summer insolation dominates (Hughes et al., 2020). Thus, summer solar input along  
with temperatures may have the major influence in controlling fire activity in the HNAR.

High levels of levoglucosan and  $\text{NH}_4^+$  fluxes from 5 to 4.5 kyr BP could be linked to the NH warm temperatures of the early-  
to-mid Holocene. In fact, Marcott et al. (2013) find warmer temperatures from 9.5 to 5.5 kyr B.P, followed by a cooling trend  
from 5.5 kyr BP onwards. Such cooling trend could explain levoglucosan and  $\text{NH}_4^+$  trends from 5 to 4.5 kyr BP. An additional  
225 source of  $\text{NH}_4^+$  fluxes, however, could also be soil emission from Greenland ice-free areas, especially during summer when  
the seasonal ice melts (Fischer et al., 2015). RECAP levoglucosan flux shows high fluxes at 1.5 kyr BP, with a declining trend  
until 1 kyr BP, where values remain low until 0.2 kyr BP (Figure 2). This agrees with higher RECAP summer  $\delta^{18}\text{O}$  trend  
(Hughes et al., 2020). Marcott et al. (2013) and (Mann et al., 2008) document a cooling trend from a warm interval (~1500  
– 1000 kyr BP) to a cool interval (~500 – 100 years BP). The increase in levoglucosan flux over the last 200 years is most  
230 likely connected with the increase in NH temperatures and green-house gases. Charcoal records from the NH show a striking  
decrease in biomass burning from the late nineteenth century to mid-to-late twentieth century (Marlon et al., 2008), however  
this is below the resolution of the RECAP fire tracer fluxes.

RECAP levoglucosan and BC fluxes do not correlate with NEEM levoglucosan flux (Table 1) suggesting a different influence  
area. While Zennaro et al. (2014) suggest that NEEM fire sources are mainly North American and Eurasian boreal sources,  
235 RECAP is a coastal core and local sources like coastal Greenland and Iceland likely have a major influence. Furthermore, the  
15 kyr NEEM levoglucosan records shows a maximum in biomass burning at ~3.5 to 1.5 kyr BP, associated with high fire  
levels in North America and Europe and to wetter conditions in North America (Zennaro et al., 2015). Such trend is not found  
for RECAP proxies. For the last 2 kyr, a declining trend starting at ~1.5 kyr BP is in common with NEEM and RECAP fore  
proxies, however, during the MWP between 1000-1300 AD (the Medieval Warm Period) NEEM levoglucosan increases again  
240 while RECAP fire proxies keep low values. The little similarities between NEEM and RECAP fire proxies give further hint  
that the two sites likely have different source areas.

Based on the Global Charcoal Database, fire regime reconstructions in the Northern Hemisphere have been compiled for  
North America, North Europe and Siberia regions, as well as for the whole High Latitude Northern Hemisphere ( $\text{lat} > 55^\circ$ )  
and some of these could contribute to RECAP levoglucosan flux. Our statistical analysis suggests weak correlations between  
245 RECAP biomass burning fluxes and charcoal composites from North America (Table 1). RECAP levoglucosan and BC are  
significantly but negatively correlated with HLNH and Northern Europe composite charcoal records. The negative correlation  
does not explain the trend observed in the RECAP records but suggests instead that different fire regimes might exist between  
Northern Europe and the HNAR. General circulation patterns and storm tracks mostly West to East likely move the European  
fires away from Renland, giving further hint that Northern Europe fire history is not be captured by RECAP ice.



250 Two regions that might influence fire proxies deposition in the Renland site are yet to be considered: Siberia and Iceland. Past information of fire activity in the Siberia region come from few charcoal datasets and the Belukha ice core nitrate and potassium records (Eichler et al., 2011). Comparing all these available proxies over the last 750 years show that the forest fire activity increased between 1600 and 1680 AD (Eichler et al., 2011). Similar to the regions of North America and North Europe, no correlation is found between RECAP ice core fire records and the composite charcoal record for the Siberia region. For Iceland, 255 however, no fire history record is available to our knowledge. The contribution from Greenland can be only considered in warm periods of Holocene, when the ice sheet retreats and the coasts are subject to the smoldering of peats.

Based on the absence of correlation between fire tracer fluxes and any charcoal record from the regions investigated as possible sources, the low correlation with NEEM levoglucosan flux and the results from back-trajectory analysis we suggest that the main source of fire markers that are deposited to Renland might the Icelandic region. Iceland has a high aeolian activity 260 driven by climate, volcanic activity and glacial sediment supply. Atmospheric low-pressure systems are common, sometimes referred as the "Icelandic low", which frequently result in relatively high wind speeds (Arnalds et al., 2016). It is thus likely that RECAP fire proxies respond more to a local influence rather than a hemispheric trend and are affected by fire emissions from Iceland. The fire history of Iceland has never been documented and the RECAP ice core might represent the first record preserving past Icelandic fire changes. The significant link between levoglucosan and BC with temperature reconstruction as 265 well as RECAP  $\delta^{18}\text{O}$  suggests that the change of Icelandic fire regime might have been mostly driven by climate fluctuations. The presence of birch forests covering the Icelandic territory is well documented for the last 2.5 kyr (Streeter et al., 2015) and the expansion of vegetation is strongly dependent on climate (Haraldsson and Ólafsdóttir, 2003).

Although the Icelandic territory is characterized by high humidity and frequent precipitation (Ólafsson et al., 2007) that could limit fire propagation, natural fires might be triggered more easily than in other regions due to the large number of 270 volcanoes and associated eruptions (Butwin et al., 2018).

#### 4.1.1 Additional processes explaining fire proxy variability

Global climate alone may not be the only driver of fire activity. Additional processes are suggested to have an impact on the fire regime (Marlon et al., 2008), such as the anthropogenic activities including land clearance, ice sheet advance/retreat and peat fires accentuated by permafrost thawing, altering the temporal and spatial structure of fuel and the frequency of ignitions 275 since the early Holocene (Pfeiffer et al., 2013; Vannière et al., 2016; Andela et al., 2017).

From change point analysis conducted on fire fluxes and on ratios with temperature we identify three main changes at approximately 4.5, 1.1 and 0.2 kyr BP, found to be common to more than one time series. In the following sections we formulate hypotheses about possible processes inducing fire regime variability.

#### 4.1.2 Period 5 – 4.5 kyr BP: Decline of summer insolation

280 One possible process explaining levoglucosan and  $\text{NH}_4^+$  fluxes decline during the period 5 – 4.5 kyr BP is the monotonic Holocene decline in Northern Hemisphere summer insolation. Cooler conditions caused cryosphere expansion and progressively lowered Equilibrium Line Altitude in the highlands in Iceland, as well as in the eastern Greenland, the Baffin Islands,

Western Svalbard and Western Norway (Geirsdóttir et al., 2018). High-resolution lacustrine records (Geirsdóttir et al., 2013) indicate that, despite the monotonic decline in summer insolation, Iceland's landscape changes and ice cap expansions were nonlinear with abrupt changes occurring at 5, 4.5 – 4.0, 3, and 1.5 kyr BP. It is possible that the abrupt decline in levoglucosan and  $\text{NH}_4^+$  fluxes at 4.5 kyr BP was the result of consistent glacier advance and consequent reduction of vegetation. Eddudóttir (2016) found decreased *Betula pubescens* pollen counts in a lake record from the northwest highlands, giving further evidence of the retreat of woodland from 6 to 4 kyr BP, which might have caused a reduction in fuel availability. Cooler summers and the reduced availability of fuel may thus be the cause of the observed reduction in fire regime in the HNAR.

RECAP levoglucosan and BC fluxes have different trends in the period 5 – 4.5 kyr BP (Figure 2,3). One possible explanation is that during the mid-Holocene larger areas of the Greenland coasts and Iceland were ice-free (Geirsdóttir et al., 2009) and subject to wildfires linked to smoldering of peats. Such wildfires are fueled by the organic matter contained in the soil and are accentuated by the melting of permafrost. Peat fires along the Greenland coasts might explain the higher fluxes of levoglucosan and ammonium at this stage. BC, instead, is mostly emitted under flaming conditions (Legrand et al., 2016) and there is uncertainty regarding BC as a good proxy to trace peat fires (Jayarathne et al., 2017). Further studies, however, are necessary to understand the mechanisms explaining the diverging behavior of levoglucosan and BC.

#### 4.1.3 Change at 1.1 kyr BP: Viking colonization of Iceland

The **step** change on levoglucosan and BC fluxes, Levo/T and BC/T at 1.1 kyr BP may be explained considering human activities in Iceland (Figure 3). Iceland was colonized **ADfrom** Scandinavia and Britain in the late 9<sup>th</sup> century AD (Vésteinsson and McGovern, 2012) and since then it experienced a rapid and comprehensive deforestation in a matter of decades, during which large areas completely lost their woodland cover after the arrival of the first settlers (Erlendsson and Edwards, 2009; Streeter et al., 2015). The early settlers cleared land mainly through felling compared to burning, since charcoal layers have been identified only in a small number of sites (Trbojević, 2016). The Viking colonization of Iceland resulted in the loss of more than 25% of the vegetation and to catastrophic soil erosion (Haraldsson and Ólafsdóttir, 2003; Erlendsson and Edwards, 2009; Greipsson, 2012), leading to a reduction of the areas which could support vegetation and that would be burned in case of the triggering of a fire. The decline of RECAP fire proxies at 1.1 kyr BP would thus be a consequence of the reduction of vegetation in Iceland. Although the climatic cooling, strengthened from year 700 BP onwards, might have had the greatest effect on reducing fire regime in the HNAR, this might not be completely explained without considering the human contribution. It is likely that the inappropriate human management of natural resources acted in parallel to climatic cooling, causing what is recognized to be one of the first environmental disasters.

#### 4.1.4 The last 200 years: global increase in temperatures and land conversion rates

Levoglucosan flux and Levo/T shift over the last few centuries (Figure 3a,b). Levoglucosan flux changes 200 years BP while Levo/T change is anticipated by ~170 years. The shift of levoglucosan to higher values is probably related to increases in land-cover conversion rates in boreal regions (Zennaro et al., 2014), which act together with increases in global temperatures and green-house gases concentrations. The last decades of the nineteenth century were the period of the maximum expansion of

population and agriculture in many areas of the Northern Hemisphere. Zennaro et al. (2014) found relatively high levoglucosan values in the NEEM ice core during the last two centuries, although a clear assessment was not possible due to lack of data. Several charcoal records from North America and Europe evidence an increase since ~1800 (as also reported in Figure 3f,g,i) and have been attributed both to climate and to the increasing use of fire for land clearance (Marlon et al., 2008, 2016).

320 The abrupt increase of  $\text{NH}_4^+$  in the last 120 years BP may be attributed to anthropogenic emissions. Wendl et al. (2015) argued that trends in  $\text{NH}_4^+$  concentrations in the Lomonosovfonna-09 ice core (Svalbard) after 1940 AD indicate a strong anthropogenic influence mainly from  $\text{NH}_3$  emissions from agriculture and livestock in Eurasia. No BC data are available for the last 500 years, however, high values of BC flux are expected since several shallow cores from Svalbard and Greenland show broad concentration maxima starting from 1860 AD and are attributed to anthropogenic emissions (Osmont et al., 2018).

## 325 **5 Conclusions**

This paper provides 5 kyr records of fire proxies levoglucosan, BC and  $\text{NH}_4^+$  in the RECAP ice core in Greenland.

From back trajectory analysis and the comparison with regional fire reconstructions based on charcoal records, we find that the most likely source area of impurities arriving at Renland is the High North Atlantic Region (ranging from the longitudes  $60^\circ\text{W} - 0^\circ$  and the latitudes  $90^\circ\text{N} - 55^\circ\text{N}$ ) and comprehends the Greenland Ice Sheet, the coasts of Greenland and Iceland. Iceland, in particular, could have a great influence in driving fire regime changes in RECAP fire proxies due to its position with respect to the Renland site and to the presence of large forested areas throughout the Holocene. In the Northern Hemisphere, Iceland is also the only region which is not up until now covered by fire reconstructions and RECAP fire proxies might represent the first reconstruction of past Icelandic fire regime.

We find that climate variability is the main control of changes in the High North Atlantic fire regime, and especially temperature driven by summer insolation. A downturn of levoglucosan and  $\text{NH}_4^+$  fluxes at 4.5 kyr BP may be associated with the monotonic Holocene decline in Northern Hemisphere summer insolation that resulted in cooler conditions, cryosphere expansion and vegetation reduction in the HNAR. BC shows a different trend in this period, possibly explained by wildfires linked to smoldering of peats along the Greenland coasts due to warmer temperatures and melting of permafrost. While levoglucosan and  $\text{NH}_4^+$  can record peat fires, BC is not a good proxy because is emitted during flaming conditions when biomass burns. Further studies are necessary to confirm our hypothesis. During the last millennium the fire regime may have been influenced by the human impact in the Icelandic environment, which was uninhabited before the arrival of the Vikings. The massive land clearing and the active fire suppression probably led to a reduction of wildfires. The human impact on the fire regime probably accentuated over the last centuries due to population expansion and increases in land cover conversion rates for agricultural purposes.

345 *Data availability.* The dataset will be published in the Pangaea database.

*Author contributions.* DS and AS designed the research. MCVH, RZ and EB performed the levoglucosan analysis, HAK, MS, BV and PV processed the ice core samples, run the ammonium analysis and helped in the data interpretation, RE performed black carbon analysis, DS and NM performed and run the back-trajectory analysis, DB, CB, CT, OV, AS and DS contributed to the data interpretation. DS and AS wrote the manuscript with inputs from all the authors.

350 *Competing interests.* The authors declare no conflict of interest.

*Acknowledgements.* The RECAP ice coring effort was financed by the Danish Research Council through a Sapere Aude grant, the NSF through the Division of Polar Programs, the Alfred Wegener Institute, and the European Research Council under the European Community's Seventh Framework Programme (FP7/2007-2013)/ERC grant agreement 610055 through the Ice2Ice project. The research leading to these results has received funding from the European Union's Seventh Framework programme ("Ideas" Specific Programme, ERC Advanced Grant) under grant agreement no. 267696 "EARLYhumanIMPACT". We acknowledge the help of ELGA LabWater which provides the ultrapure water used for levoglucosan analysis at Ca' Foscari University of Venice.

355

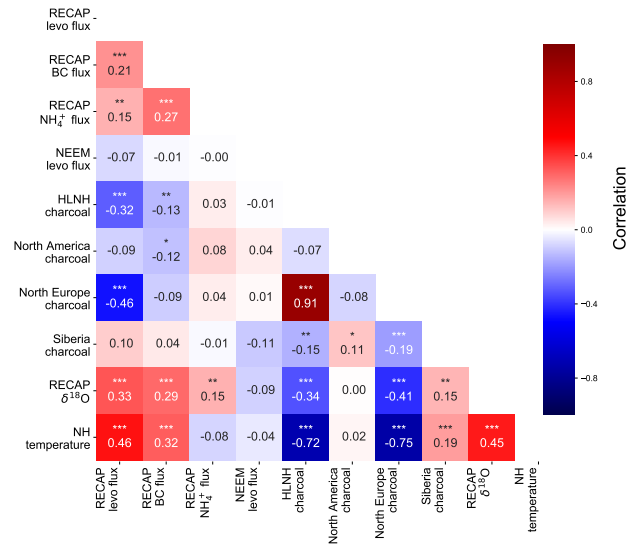

**Table 1.** Correlation matrix of 5 kyr records with resolution of 20 years. \*\*\* indicates  $p < 0.01$ , \*\* indicates  $p < 0.05$  and \* indicates  $p < 0.1$ . The colorbar represents the correlation from -1 to 1.

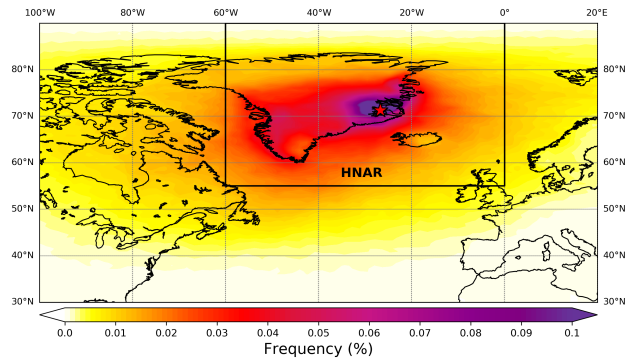

**Figure 1.** Seven-days back trajectories of years 2006-2019 at 500, 1000 and 2000 meters above Renland elevation, indicated as number of endpoints divided by number of trajectories. When more than one point of the same trajectory fall in the same grid cell, they are counted as one. The black box indicates the High North Atlantic Region (HNAR), extending between 60°W – 0° in longitude and 90°N – 55° N in latitude. The red star indicates the Renland site.

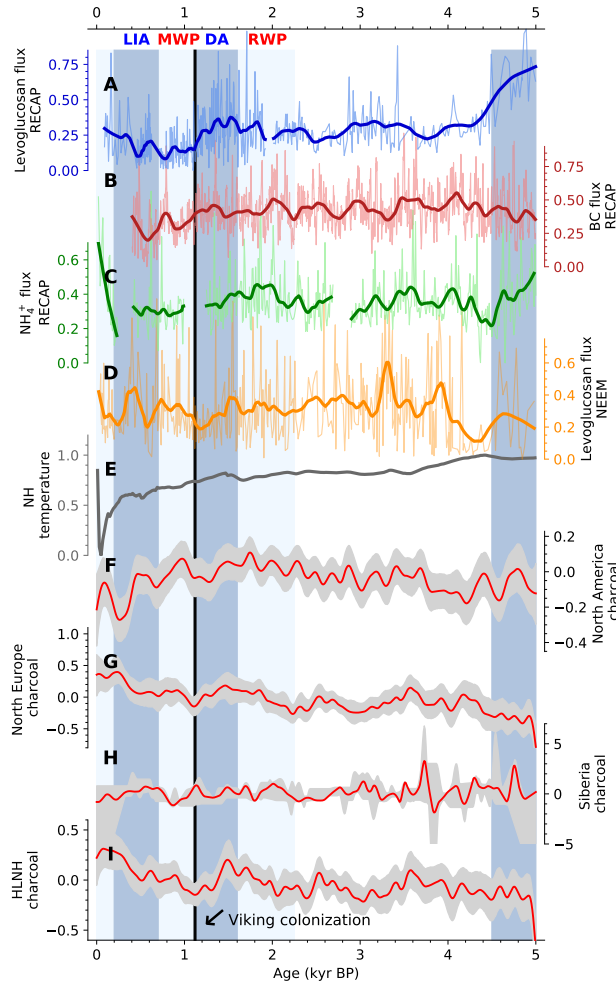

**Figure 2.** Normalized 5 kyr time series of: (a) RECAP levoglucosan flux; (b) RECAP BC flux; (c) RECAP  $\text{NH}_4^+$  flux; (d) NEM levoglucosan flux (Zennaro et al., 2015); (e) NH temperature reconstruction ( $90^\circ - 30^\circ$  latitude) (Marcott et al., 2013); (f-g-h-i) Charcoal composite record of North America, North Europe, Siberia and Northern Hemisphere ( $\text{lat} > 55^\circ$ ), respectively (red lines) with 0.05 and 0.95 confidence levels (gray areas). The black line indicates the time of the Viking colonization of Iceland. Age scale is indicated as 1000 years before 2000.

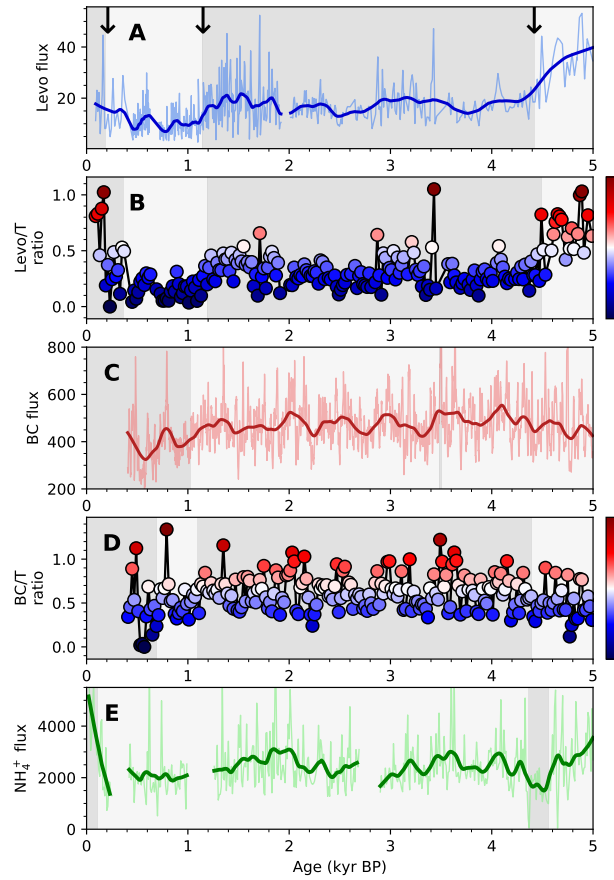

**Figure 3.** Change point analysis of: (a) levoglucosan flux; (b) ratio of normalized levoglucosan and NH temperature; (c) BC flux; (d) ratio of normalized levoglucosan and NH temperature; (e)  $\text{NH}_4^+$  flux. The change of background color indicates the mean shift. The significant breakpoints are indicated by a change of color. The changes in common to more than one time series are indicated by an arrow.



## References

- Andela, N., Morton, D. C., Giglio, L., Chen, Y., van der Werf, G. R., Kasibhatla, P. S., DeFries, R. S., Collatz, G. J., Hantson, S., Kloster, S., Bachelet, D., Forrest, M., Lasslop, G., Li, F., Mangeon, S., Melton, J. R., Yue, C., and Randerson, J. T.: A human-driven decline in global burned area, *Science*, 356, 1356–1362, <https://doi.org/10.1126/science.aal4108>, 2017.
- 360 Arnalds, O., Dagsson-Waldhauserova, P., and Olafsson, H.: The Icelandic volcanic aeolian environment: Processes and impacts — A review, *Aeolian Research*, 20, 176 – 195, <https://doi.org/https://doi.org/10.1016/j.aeolia.2016.01.004>, 2016.
- Barrett, T., Ponette-González, A., Rindy, J., and Weathers, K.: Wet deposition of black carbon: A synthesis, *Atmospheric Environment*, 213, <https://doi.org/10.1016/j.atmosenv.2019.06.033>, 2019.
- 365 Battistel, D., Kehrwald, N. M., Zennaro, P., Pellegrino, G., Barbaro, E., Zangrando, R., Pedeli, X. X., Varin, C., Spolaor, A., Vallelonga, P. T., Gambaro, A., and Barbante, C.: High-latitude Southern Hemisphere fire history during the mid- to late Holocene (6000-750 BP), *Climate of the Past*, 14, 871–886, <https://doi.org/10.5194/cp-14-871-2018>, 2018.
- Bhattarai, H., Saikawa, E., Wan, X., Zhu, H., Ram, K., Gao, S., Kang, S., Zhang, Q., Zhang, Y., Wu, G., Wang, X., Kawamura, K., Fu, P., and Cong, Z.: Levoglucosan as a tracer of biomass burning: Recent progress and perspectives, *Atmospheric Research*, 220, 20 – 33, <https://doi.org/https://doi.org/10.1016/j.atmosres.2019.01.004>, 2019.
- 370 Bigler, M., Svensson, A., Kettner, E., Vallelonga, P., Nielsen, M., and Steffensen, J.: Optimization of High-Resolution Continuous Flow Analysis for Transient Climate Signals in Ice Cores, *Environmental Science & Technology*, 45, 4483–9, <https://doi.org/10.1021/es200118j>, 2011.
- Blarquez, O., Vannière, B., Marlon, J. R., Daniau, A.-L., Power, M. J., Brewer, S., and Bartlein, P. J.: *paleofire*: An R package to analyse sedimentary charcoal records from the Global Charcoal Database to reconstruct past biomass burning, *Computers & Geosciences*, 72, 255 – 261, <https://doi.org/https://doi.org/10.1016/j.cageo.2014.07.020>, 2014.
- 375 Bond, T., Doherty, S., Fahey, D., Forster, P., Berntsen, T., DeAngelo, B., Flanner, M., Ghan, S., Kärcher, B., Koch, D., Kinne, S., Kondo, Y., Quinn, P., Sarofim, M., Schultz, M., Michael, S., Venkataraman, C., Zhang, H., Zhang, S., and Zender, C.: Bounding the role of black carbon in the climate system: A Scientific assessment, *Journal of Geophysical Research: Atmospheres*, 118, 5380–5552, <https://doi.org/10.1002/jgrd.50171>, 2013.
- 380 Bowman, D. M. J. S., Balch, J. K., Artaxo, P., Bond, W. J., Carlson, J. M., Cochrane, M. A., D’Antonio, C. M., DeFries, R. S., Doyle, J. C., Harrison, S. P., Johnston, F. H., Keeley, J. E., Krawchuk, M. A., Kull, C. A., Marston, J. B., Moritz, M. A., Prentice, I. C., Roos, C. I., Scott, A. C., Swetnam, T. W., van der Werf, G. R., and Pyne, S. J.: Fire in the Earth System, *Science*, 324, 481–484, <https://doi.org/10.1126/science.1163886>, 2009.
- 385 Butwin, M., Löwis, S., Pfeffer, M., and Thorsteinsson, T.: The Effects of Volcanic Eruptions on the Frequency of Particulate Matter Suspension Events in Iceland, *Journal of Aerosol Science*, 128, 99–113, <https://doi.org/10.1016/j.jaerosci.2018.12.004>, 2018.
- Cape, J., Coyle, M., and Dumitrescu, P.: The atmospheric lifetime of black carbon, *Atmospheric Environment*, 59, 256 – 263, <https://doi.org/https://doi.org/10.1016/j.atmosenv.2012.05.030>, 2012.
- Corella, J., Maffezzoli, N., Cuevas, C., Vallelonga, P., Spolaor, A., Cozzi, G., Müller, J., Vinther, B., Barbante, C., Kjær, H., Edwards, R., and Alfonso, S.-L.: Holocene atmospheric iodine evolution over the North Atlantic, *Climate of the Past*, 15, 2019–2030, <https://doi.org/10.5194/cp-15-2019-2019>, 2019.
- Daniau, A., Bartlein, P. J., Harrison, S. P., Prentice, I. C., Brewer, S., Friedlingstein, P., Harrison-Prentice, T. I., Inoue, J., Izumi, K., Marlon, J. R., Mooney, S., Power, M. J., Stevenson, J., Tinner, W., Andrič, M., Atanassova, J., Behling, H., Black, M., Blarquez, O., Brown, K. J.,

- 395 Carcaillet, C., Colhoun, E. A., Colombaroli, D., Davis, B. A. S., D'Costa, D., Dodson, J., Dupont, L., Eshetu, Z., Gavin, D. G., Genries, A., Haberle, S., Hallett, D. J., Hope, G., Horn, S. P., Kassa, T. G., Katamura, F., Kennedy, L. M., Kershaw, P., Krivonogov, S., Long, C., Magri, D., Marinova, E., McKenzie, G. M., Moreno, P. I., Moss, P., Neumann, F. H., Norström, E., Paitre, C., Rius, D., Roberts, N., Robinson, G. S., Sasaki, N., Scott, L., Takahara, H., Terwilliger, V., Thevenon, F., Turner, R., Valsecchi, V. G., Vannièrè, B., Walsh, M., Williams, N., and Zhang, Y.: Predictability of biomass burning in response to climate changes, *Global Biogeochemical Cycles*, 26, <https://doi.org/10.1029/2011GB004249>, 2012.
- 400 Doughty, C. E.: Preindustrial Human Impacts on Global and Regional Environment, *Annual Review of Environment and Resources*, 38, 503–527, <https://doi.org/10.1146/annurev-environ-032012-095147>, 2013.
- Eddudóttir, S.: Holocene Environmental Change in Northwest Iceland, Ph.D. thesis, University of Iceland., 2016.
- Eichler, A., Tinner, W., Brüttsch, S., Olivier, S., Papina, T., and Schwikowski, M.: An ice-core based history of Siberian forest fires since AD 1250, *Quaternary Science Reviews*, 30, 1027–1034, <https://doi.org/10.1016/j.quascirev.2011.02.007>, 2011.
- 405 Erlendsson, E. and Edwards, K. J.: The timing and causes of the final pre-settlement expansion of *Betula pubescens* in Iceland, *The Holocene*, 19, 1083–1091, <https://doi.org/10.1177/0959683609341001>, 2009.
- Feurdean, A., Vannièrè, B., Finsinger, W., Warren, D., Connor, S. C., Forrest, M., Liakka, J., Panait, A., Werner, C., Andrič, M., Bobek, P., Carter, V. A., Davis, B., Diaconu, A.-C., Dietze, E., Feeser, I., Florescu, G., Gałka, M., Giesecke, T., Jahns, S., Jamrichová, E., Kajukalo, K., Kaplan, J., Karpińska-Kołaczek, M., Kołaczek, P., Kuneš, P., Kupriyanov, D., Lamentowicz, M., Lemmen, C., Magyari, E. K., Marcisz, K., Marinova, E., Niamir, A., Novenko, E., Obremka, M., Pędziszewska, A., Pfeiffer, M., Poska, A., Rösch, M., Słowiński, M., Stančikaitė, M., Szal, M., Święta Musznicka, J., Tanțău, I., Theuerkauf, M., Tonkov, S., Valkó, O., Vassiljev, J., Veski, S., Vincze, I., Wacnik, A., Wiethold, J., and Hickler, T.: Fire hazard modulation by long-term dynamics in land cover and dominant forest type in eastern and central Europe, *Biogeosciences*, 17, 1213–1230, <https://doi.org/10.5194/bg-17-1213-2020>, 2020.
- 410 Fischer, H., Schüpbach, S., Gfeller, G., Bigler, M., Röthlisberger, R., Erhardt, T., Stocker, T. F., Mulvaney, R., and Wolff, E. W.: Millennial changes in North American wildfire and soil activity over the last glacial cycle, *Nature Geoscience*, 8, 723–727, <https://doi.org/https://doi.org/10.1038/ngeo2495>, 2015.
- Gambaro, A., Zangrando, R., Gabrielli, P., Barbante, C., and Cescon, P.: Direct Determination of Levoglucosan at the Picogram per Milliliter Level in Antarctic Ice by High-Performance Liquid Chromatography/Electrospray Ionization Triple Quadrupole Mass Spectrometry, *Analytical chemistry*, 80, 1649–1655, <https://doi.org/10.1021/ac701655x>, 2008.
- 420 Geirsdóttir, A., Miller, G. H., Axford, Y., and Sædís Ólafsdóttir: Holocene and latest Pleistocene climate and glacier fluctuations in Iceland, *Quaternary Science Reviews*, 28, 2107–2118, <https://doi.org/https://doi.org/10.1016/j.quascirev.2009.03.013>, holocene and Latest Pleistocene Alpine Glacier Fluctuations: A Global Perspective, 2009.
- Geirsdóttir, A., Miller, G., Larsen, D., and Olafsdóttir, S.: Abrupt Holocene climate transitions in the northern North Atlantic region recorded by synchronized lacustrine records in Iceland, *Quaternary Science Reviews*, 70, 48–62, <https://doi.org/10.1016/j.quascirev.2013.03.010>, 425 2013.
- Geirsdóttir, A., Miller, G., Andrews, J., Harning, D., Anderson, L., and Thordarson, T.: The onset of Neoglaciation in Iceland and the 4.2 ka event, *Climate of the Past Discussions*, pp. 1–33, <https://doi.org/10.5194/cp-2018-130>, 2018.
- Greipsson, S.: Catastrophic soil erosion in Iceland: Impact of long-term climate change, compounded natural disturbances and human driven land-use changes, *CATENA*, 98, 41 – 54, <https://doi.org/https://doi.org/10.1016/j.catena.2012.05.015>, 2012.
- 430 Grieman, M. M., Aydin, M., Isaksson, E., Schwikowski, M., and Saltzman, E. S.: Aromatic acids in an Arctic ice core from Svalbard: a proxy record of biomass burning, *Climate of the Past*, 14, 637–651, <https://doi.org/10.5194/cp-14-637-2018>, 2018.

- Haraldsson, H. and Ólafsdóttir, R.: Simulating vegetation cover dynamics with regards to long-term climatic variations in sub-Arctic landscapes, *Global and Planetary Change*, 38, 313–325, [https://doi.org/10.1016/S0921-8181\(03\)00114-0](https://doi.org/10.1016/S0921-8181(03)00114-0), 2003.
- Hoffmann, D., Tilgner, A., Iinuma, Y., and Herrmann, H.: Atmospheric stability of levoglucosan: a detailed laboratory and modeling study, *Environmental Science & Technology*, 44, 694–699, <https://doi.org/10.1021/es902476f>, 2010.
- Hughes, A., Jones, T., Vinther, B., Gkinis, V., Stevens, C., Morris, V., Vaughn, B., Holme, C., Markle, B., and White, J.: High-frequency climate variability in the Holocene from a coastal-dome ice core in East-Central Greenland, *Climate of the Past*, 16, 1369–1386, <https://doi.org/10.5194/cp-16-1369-2020>, 2020.
- Jayarathne, T., Stockwell, C., Gilbert, A., Daugherty, K., Cochrane, M., Ryan, K., Putra, E., Saharjo, B., Dwi Nurhayati, A., Albar, I., Yokelson, R., and Stone, E.: Chemical characterization of fine particulate matter emitted by peat fires in Central Kalimantan, Indonesia, during the 2015 El Niño, *Atmospheric Chemistry and Physics Discussions*, pp. 1–47, <https://doi.org/10.5194/acp-2017-608>, 2017.
- Keywood, M., Kanakidou, M., Stohl, A., Dentener, F., Grassi, G., Meyer, C. P., Torseth, K., Edwards, D., Thompson, A. M., Lohmann, U., and Burrows, J.: Fire in the Air: Biomass Burning Impacts in a Changing Climate, *Critical Reviews in Environmental Science and Technology*, 43, 40–83, <https://doi.org/10.1080/10643389.2011.604248>, 2013.
- Legrand, M., McConnell, J., Fischer, H., Wolff, E. W., Preunkert, S., Arienzo, M., Chellman, N., Leuenberger, D., Maselli, O., Place, P., Sigl, M., Schüpbach, S., and Flannigan, M.: Boreal fire records in Northern Hemisphere ice cores: a review, *Climate of the Past*, 12, 2033–2059, <https://doi.org/10.5194/cp-12-2033-2016>, 2016.
- Lim, S., Faïn, X., Ginot, P., Mikhalenko, V., Kutuzov, S., Paris, J.-D., Kozachek, A., and Laj, P.: Black carbon variability since preindustrial times in Eastern part of Europe reconstructed from Mt Elbrus, Caucasus ice cores, *Atmospheric Chemistry and Physics Discussions*, pp. 1–30, <https://doi.org/10.5194/acp-2016-804>, 2016.
- Maffezzoli, N., Vallelonga, P., Edwards, R., Saiz-Lopez, A., Turetta, C., Kjær, H. A., Barbante, C., Vinther, B., and Spolaor, A.: A 120 000-year record of sea ice in the North Atlantic?, *Climate of the Past*, 15, 2031–2051, <https://doi.org/10.5194/cp-15-2031-2019>, 2019.
- Mann, M. E., Zhang, Z., Hughes, M. K., Bradley, R. S., Miller, S. K., Rutherford, S., and Ni, F.: Proxy-based reconstructions of hemispheric and global surface temperature variations over the past two millennia, *Proceedings of the National Academy of Sciences*, 105, 13 252–13 257, <https://doi.org/10.1073/pnas.0805721105>, 2008.
- Marcott, S., Shakun, J., Clark, P., and Mix, A.: A Reconstruction of Regional and Global Temperature for the Past 11,300 Years, *Science* (New York, N.Y.), 339, 1198–201, <https://doi.org/10.1126/science.1228026>, 2013.
- Marlon, J. R., Bartlein, P. J., Carcaillet, C., Gavin, D. G., Harrison, S. P., Higuera, P. E., Joos, F., Power, M. J., and Prentice, I. C.: Climate and human influences on global biomass burning over the past two millennia, *Nature Geoscience*, 1, 697–702, <https://doi.org/https://doi.org/10.1038/ngeo313>, 2008.
- Marlon, J. R., Bartlein, P. J., Daniau, A.-L., Harrison, S. P., Maezumi, S. Y., Power, M. J., Tinner, W., and Vanniére, B.: Global biomass burning: a synthesis and review of Holocene paleofire records and their controls, *Quaternary Science Reviews*, 65, 5 – 25, <https://doi.org/https://doi.org/10.1016/j.quascirev.2012.11.029>, 2013.
- Marlon, J. R., Kelly, R., Daniau, A.-L., Vanniére, B., Power, M. J., Bartlein, P., Higuera, P., Blarquez, O., Brewer, S., Brücher, T., Feurdean, A., Romera, G. G., Iglesias, V., Maezumi, S. Y., Magi, B., Courtney Mustaphi, C. J., and Zhihai, T.: Reconstructions of biomass burning from sediment-charcoal records to improve data-model comparisons, *Biogeosciences*, 13, 3225–3244, <https://doi.org/10.5194/bg-13-3225-2016>, 2016.

- 470 McConnell, J. R., Edwards, R., Kok, G. L., Flanner, M. G., Zender, C. S., Saltzman, E. S., Banta, J. R., Pasteris, D. R., Carter, M. M., and Kahl, J. D. W.: 20th-Century Industrial Black Carbon Emissions Altered Arctic Climate Forcing, *Science*, 317, 1381–1384, <https://doi.org/10.1126/science.1144856>, 2007.
- Molinari, C., Lehsten, V., Blarquez, O., Carcaillet, C., Davis, B. A. S., Kaplan, J. O., Clear, J., and Bradshaw, R. H. W.: The climate, the fuel and the land use: Long-term regional variability of biomass burning in boreal forests, *Global Change Biology*, 24, 4929–4945, <https://doi.org/10.1111/gcb.14380>, 2018.
- Ólafsson, H., Furger, M., and Brümmer, B.: The weather and climate of Iceland, *Meteorologische Zeitschrift*, 16, 5–8, 475 <https://doi.org/10.1127/0941-2948/2007/0185>, 2007.
- Osmont, D., Wendl, I., Schmidely, L., Sigl, M., Vega Riquelme, C., Isaksson, E., and Schwikowski, M.: An 800 year high-resolution black carbon ice-core record from Lomonosovfonna, Svalbard, *Atmospheric Chemistry and Physics Discussions*, pp. 1–30, <https://doi.org/10.5194/acp-2018-244>, 2018.
- Osmont, D., Sigl, M., Eichler, A., Jenk, T., and Schwikowski, M.: A Holocene black carbon ice-core record of biomass burning in the 480 Amazon Basin from Illimani, Bolivia, *Climate of the Past*, 15, 579–592, <https://doi.org/10.5194/cp-15-579-2019>, 2019.
- Pfeiffer, M., Spessa, A., and Kaplan, J.: A model for global biomass burning in preindustrial time: LPJ-LMfire (v1.0), *Geoscientific Model Development*, 6, 643–685, <https://doi.org/10.5194/gmd-6-643-2013>, 2013.
- Power, M., Marlon, J., Ortiz, N., Bartlein, P., Harrison, S., Mayle, F., Ballouche, A., Bradshaw, R., Carcaillet, C., Cordova, C., Mooney, S., Moreno, P., Prentice, I., Thonicke, K., Tinner, W., Whitlock, C., Zhang, Y., Zhao, Y., Ali, A., Anderson, R., Beer, R., Behling, H., Briles, 485 C., Brown, K., Brunelle, A., Bush, M., Camill, P., Chu, G., Clark, J., Colombaroli, D., Connor, S., Daniiau, A., Daniels, M., Dodson, J., Doughty, E., Edwards, M., Finsinger, W., Foster, D., Frechette, J., Gaillard, M., Gavin, D., Gobet, E., Haberle, S., Hallett, D., Higuera, P., Hope, G., Horn, S., Inoue, J., Kaltenrieder, P., Kennedy, L., Kong, Z., Larsen, C., Long, C., Lynch, J., Lynch, E., McGlone, M., Meeks, S., Mensing, S., Meyer, G., Minckley, T., Mohr, J., Nelson, D., New, J., Newnham, R., Noti, R., Oswald, W., Pierce, J., Richard, P., Rowe, C., Sanchez Goñi, M., Shuman, B., Takahara, H., Toney, J., Turney, C., Urrego-Sanchez, D., Umbanhowar, C., Vandergoes, M., Vanniere, B., 490 Vescovi, E., Walsh, M., Wang, X., Williams, N., Wilmshurst, J., and Zhang, J.: Changes in fire regimes since the Last Glacial Maximum: An assessment based on a global synthesis and analysis of charcoal data, *Climate Dynamics*, 30, 887–907, <https://doi.org/10.1007/s00382-007-0334-x>, 2008.
- Price, T. D.: *Europe’s First Farmers*, Cambridge University Press, <https://doi.org/10.1017/CBO9780511607851>, 2000.
- Ramanathan, V. and Carmichael, G.: Global and Regional Climate Changes Due to Black Carbon, *Nature Geoscience*, 1, 221–227, 495 <https://doi.org/10.1038/ngeo156>, 2008.
- Rubino, M., D’Onofrio, A., Seki, O., and Bendle, J.: Ice-core records of biomass burning, *The Anthropocene Review*, 3, <https://doi.org/10.1177/2053019615605117>, 2015.
- Ruddiman, W.: The Anthropogenic Greenhouse Era Began Thousands of Years Ago., *Climatic change*, 61, 261–293, <https://doi.org/https://doi.org/10.1023/B:CLIM.0000004577.17928.fa>, 2003.
- 500 Ruddiman, W. and Ellis, E.: Effect Of Per-Capita Land Use Changes On Holocene Forest Clearance And CO<sub>2</sub> Emissions, *Quaternary Science Reviews*, 28, 3011–3015, <https://doi.org/10.1016/j.quascirev.2009.05.022>, 2009.
- Sapart, C., Monteil, G., Prokopiou, M., Wal, R., Kaplan, J., Sperlich, P., Krumhardt, K., Veen, C., Houweling, S., Krol, M., Blunier, T., Sowers, T., Martinerie, P., Witrant, E., Dahl-Jensen, D., and Röckmann, T.: Natural and anthropogenic variations in methane sources during the past two millennia, *Nature*, 490, 85–8, <https://doi.org/10.1038/nature11461>, 2012.

- 505 Schüpbach, S., Fischer, H., Bigler, M., Erhardt, T., Gfeller, G., Leuenberger, D., Mini, O., Mulvaney, R., Abram, N., Fleet, L., Frey, M., Thomas, E., Svensson, A., Dahl-Jensen, D., Kettner, E., Kjær, H., Seierstad, I., Steffensen, J., Rasmussen, S., and Wolff, E.: Greenland records of aerosol source and atmospheric lifetime changes from the Eemian to the Holocene, *Nature Communications*, 9, <https://doi.org/10.1038/s41467-018-03924-3>, 2018.
- Simoneit, B. R. T.: A review of biomarker compounds as source indicators and tracers for air pollution, *Environmental Science and Pollution Research*, 6, 159–169, <https://doi.org/10.1007/BF02987621>, 1999.
- 510 Simonsen, M. F., Baccolo, G., Blunier, T., Borunda, A., Delmonte, B., Frei, R., Goldstein, S., Grinsted, A., Kjær, H. A., Sowers, T., Svensson, A., Vinther, B., Vladimirova, D., Winckler, G., Winstrup, M., and Vallelonga, P.: East Greenland ice core dust record reveals timing of Greenland ice sheet advance and retreat, *Nature Communications*, 10, <https://doi.org/10.1038/s41467-019-12546-2>, 2019.
- Stein, A. F., Draxler, R. R., Rolph, G. D., Stunder, B. J. B., Cohen, M. D., and Ngan, F.: NOAA’s HYSPLIT Atmospheric Transport and Dispersion Modeling System, *Bulletin of the American Meteorological Society*, 96, 2059–2077, <https://doi.org/10.1175/BAMS-D-14-00110.1>, 2015.
- 515 Stohl, A., Berg, T., Burkhart, J. F., Fjérraa, A. M., Forster, C., Herber, A., Hov, Ø., Lunder, C., McMillan, W. W., Oltmans, S., Shiobara, M., Simpson, D., Solberg, S., Stebel, K., Ström, J., Tørseth, K., Treffeisen, R., Virkkunen, K., and Yttri, K. E.: Arctic smoke - record high air pollution levels in the European Arctic due to agricultural fires in Eastern Europe in spring 2006, *Atmospheric Chemistry and Physics*, 7, 511–534, <https://doi.org/10.5194/acp-7-511-2007>, 2007.
- 520 Streeter, R., Dugmore, A., Lawson, I., Erlendsson, E., and Edwards, K.: The onset of the palaeoanthropocene in Iceland: Changes in complex natural systems, *The Holocene*, DOI: 10.1177/0959683615594468, <https://doi.org/10.1177/0959683615594468>, 2015.
- Trbojević, N.: The Impact of Settlement on Woodland Resources in Viking Age Iceland, Ph.D. thesis, The School of Humanities, University of Iceland, 2016.
- 525 Truong, C., Oudre, L., and Vayatis, N.: Selective review of offline change point detection methods, *Signal Processing*, 167, 107 299, <https://doi.org/10.1016/j.sigpro.2019.107299>, 2019.
- van der Werf, G. R., Randerson, J. T., Giglio, L., Collatz, G. J., Kasibhatla, P. S., and Arellano Jr., A. F.: Interannual variability in global biomass burning emissions from 1997 to 2004, *Atmospheric Chemistry and Physics*, 6, 3423–3441, <https://doi.org/10.5194/acp-6-3423-2006>, 2006.
- 530 Vannièrè, B., Blarquez, O., Rius, D., Doyen, E., Brücher, T., Colombaroli, D., Connor, S., Feurdean, A., Hickler, T., Kaltenrieder, P., Lemmen, C., Leys, B., Massa, C., and Olofsson, J.: 7000-year human legacy of elevation-dependent European fire regimes, *Quaternary Science Reviews*, 132, 206 – 212, <https://doi.org/10.1016/j.quascirev.2015.11.012>, 2016.
- Vinther, B., Buchardt, S. L., Clausen, H., Dahl-Jensen, D., Johnsen, S., Fisher, D., Koerner, R., Raynaud, D., Lipenkov, V., Andersen, K., Blunier, T., Rasmussen, S., Steffensen, J., and Svensson, A.: Holocene thinning of the Greenland ice sheet, *Nature*, 461, 385–8, <https://doi.org/10.1038/nature08355>, 2009.
- 535 Vinther, B. M., Clausen, H. B., Johnsen, S. J., Rasmussen, S. O., Andersen, K. K., Buchardt, S. L., Dahl-Jensen, D., Seierstad, I. K., Siggaard-Andersen, M., Steffensen, J. P., Svensson, A., Olsen, J., and Heinemeier, J.: A synchronized dating of three Greenland ice cores throughout the Holocene, *Journal of Geophysical Research: Atmospheres*, 111, <https://doi.org/10.1029/2005JD006921>, 2006.
- Vésteinsson, O. and McGovern, T. H.: The Peopling of Iceland, *Norwegian Archaeological Review*, 45, 206–218, <https://doi.org/10.1080/00293652.2012.721792>, 2012.
- 540 Warner, M.: Introduction to PySPLIT: A Python toolkit for NOAA ARL’s HYSPLIT model, *Computing in Science & Engineering*, 20, 47–62, <https://doi.org/10.1109/MCSE.2017.3301549>, 2018.

- Wendl, I., Eichler, A., Isaksson, E., Martma, T., and Schwikowski, M.: 800-Year ice-core record of nitrogen deposition in Svalbard linked to ocean productivity and biogenic emissions, *Atmospheric Chemistry and Physics*, 15, 7287–7300, <https://doi.org/10.5194/acp-15-7287-2015>, 2015.
- 545
- Witze, A.: The Arctic is burning like never before — and that’s bad news for climate change, *Nature*, 585, 336–337, <https://doi.org/https://doi.org/10.1038/d41586-020-02568-y>, 2020.
- Xiao-rui, T., Mcrae, D., Li-fu, S., Ming-yu, W., and Hong, L.: Satellite remote-sensing technologies used in forest fire management, *Journal of Forestry Research*, 16, 73–78, <https://doi.org/https://doi.org/10.1007/BF02856861>, 2005.
- 550
- You, C., Yao, T., Xu, B., Xu, C., Zhao, H., and Song, L.: Effects of sources, transport, and postdepositional processes on levoglucosan records in southeastern Tibetan glaciers, *Journal of Geophysical Research: Atmospheres*, 121, 8701–8711, <https://doi.org/10.1002/2016JD024904>, 2016.
- Zennaro, P., Kehrwald, N., McConnell, J. R., Schüpbach, S., Maselli, O. J., Marlon, J., Vallelonga, P., Leuenberger, D., Zangrando, R., Spolaor, A., Borrotti, M., Barbaro, E., Gambaro, A., and Barbante, C.: Fire in ice: two millennia of boreal forest fire history from the
- 555
- Greenland NEEM ice core, *Climate of the Past*, 10, 1905–1924, <https://doi.org/10.5194/cp-10-1905-2014>, 2014.
- Zennaro, P., Kehrwald, N., Marlon, J., Ruddiman, W. F., Brücher, T., Agostinelli, C., Dahl-Jensen, D., Zangrando, R., Gambaro, A., and Barbante, C.: Europe on fire three thousand years ago: Arson or climate?, *Geophysical Research Letters*, 42, 5023–2033, <https://doi.org/10.1002/2015GL064259>, 2015.
